# Supplementary material for: Salivary Periodontopathic Bacteria in Children and Adolescents with Down Syndrome
Source: PubMed Central journal article supplement (PMC5058504; doi:10.1371/journal.pone.0162988), 2016-10-11
Supplement: pone.0162988.s001.pdf [file pone.0162988.s001.pdf]

## SUPPORTING INFORMATION

### SUPPLEMENTARY TABLES

**Supplementary Table 1 - Table S1:** Chi-square test to verify the significance of the association between groups (G-DS and DN) and gingival bleeding index

| Chi-Square Test                        |                    |    |                         |                         |                         |
|----------------------------------------|--------------------|----|-------------------------|-------------------------|-------------------------|
|                                        | Value              | Df | Asymp. Sig<br>(2-sided) | Exact Sig.<br>(2-sided) | Exact Sig.<br>(1-sided) |
| Pearson Chi-squar                      | 4.356 <sup>b</sup> | 1  | 0.37                    |                         |                         |
| Continuity<br>correctione <sup>a</sup> | 3.200              | 1  | 0.74                    |                         |                         |
| Likelihood ration                      | 4.490              | 1  | 0.34                    |                         |                         |
| Fisher's exact test                    |                    |    |                         | 0.72                    | 0.36                    |
| linear-by-linear<br>association        | 4.283              | 1  | 0.38                    |                         |                         |
| N of valid cases                       | 60                 | 1  |                         |                         |                         |

<sup>a</sup> Computed only for a 2x2 table

<sup>b</sup> 0 cells (0%) have expected count less than 5. The minimum expected count is 7.5
