# Supplementary material for: Salivary Periodontopathic Bacteria in Children and Adolescents with Down Syndrome
Source: PubMed Central journal article supplement (PMC5058504; doi:10.1371/journal.pone.0162988), 2016-10-11
Supplement: pone.0162988.s002.pdf [file pone.0162988.s002.pdf]

## SUPPORTING INFORMATION

### SUPPLEMENTARY TABLES

**Supplementary Table 3 - Table S3:** Descriptive measures (mean, median, minimum, maximum and standard deviation) for comparison of bacterial density (cells/mL X 10<sup>8</sup>) in the saliva of children and adolescents from G-DS and G-ND

| Group |                | CARE    | B/TAFO  | POGI    | TREII    | FUS         | PINT    | PNG         | ACAC         | DAPI          | Som of the probes | % do total |
|-------|----------------|---------|---------|---------|----------|-------------|---------|-------------|--------------|---------------|-------------------|------------|
| SD    | N              | 30      | 30      | 30      | 30       | 30          | 30      | 30          | 30           | 30            | 30                | 30         |
|       | Mean           | 17.707  | 17.830  | 13.140  | 12.7650  | 19.335      | 19.710  | 19.455      | 12.1350      | 1082.333<br>3 | 132.08            | 0.121687   |
|       | Median         | 13.500  | 12.550  | 10.800  | 10.1250  | 11.700      | 12.150  | 9.900       | 8.7750       | 1052.550<br>0 | 107.10            | 0.098641   |
|       | Minimum        | 5.0     | 0       | 0       | 0        | 0           | 0       | 1.4         | 1.35         | 492.75        | 31                | 0.0261     |
|       | Maximum        | 68.4    | 76.5    | 50.4    | 37.35    | 83.7        | 82.8    | 107.1       | 40.05        | 1489.05       | 357               | 0.2715     |
|       | Std. Deviation | 14.3850 | 18.3105 | 9.4396  | 9.30328  | 22.468<br>2 | 18.1477 | 22.922<br>4 | 8.8375       | 267.5856      | 88.069            | 0.066028   |
| NSD   | N              | 30      | 30      | 30      | 30       | 30          | 30      | 30          | 30           | 30            | 30                | 30         |
|       | Mean           | 15.038  | 20.865  | 10.905  | 12.0233  | 23.760      | 12.660  | 18.240      | 16.3200      | 1215.000<br>0 | 129.81            | 0.101393   |
|       | Median         | 6.750   | 14.400  | 5.175   | 3.6000   | 4.725       | 3.600   | 4.050       | 5.8500       | 1148.625<br>0 | 70.88             | 0.052354   |
|       | Minimum        | 0       | 2.7     | 0       | 0        | 0           | 0       | 0           | 0            | 878.40        | 12                | 0.0108     |
|       | Maximum        | 76.1    | 57.6    | 77.0    | 85.50    | 245.7       | 90.9    | 98.1        | 85.05        | 2282.40       | 518               | 0.3988     |
|       | Std. Deviation | 21.1195 | 17.8565 | 15.7386 | 19.73584 | 50.674<br>9 | 21.5786 | 29.016<br>8 | 24.2459<br>0 | 262.2316      | 139.392           | 0.099813   |
| Total | N              | 60      | 60      | 60      | 60       | 60          | 60      | 60          | 60           | 60            | 60                | 60         |
|       | Mean           | 16.373  | 19.348  | 12.023  | 12.3942  | 21.548      | 16.185  | 18.848      | 14.2275      | 1148,666<br>7 | 130.94            | 0.111540   |
|       | Median         | 11.600  | 12.800  | 9.450   | 8.5500   | 7.875       | 9.900   | 8.775       | 7.2000       | 1127.250<br>0 | 88.60             | 0.087650   |
|       | Minimum        | 0       | 0       | 0       | 0        | 0           | 0       | 0           | 0            | 492.75        | 12                | 0.0108     |
|       | Maximum        | 76.1    | 76.5    | 77.0    | 85.50    | 245.7       | 90.9    | 107.1       | 85.05        | 2282,40       | 518               | 0.3988     |
|       | Std. Deviation | 17.965  | 17.996  | 12.915  | 15.3013  | 38.927      | 20.084  | 25.932      | 18.215       | 271.051       | 115.603           | 0.084525   |
