# Supplementary material for: Salivary Periodontopathic Bacteria in Children and Adolescents with Down Syndrome
Source: PubMed Central journal article supplement (PMC5058504; doi:10.1371/journal.pone.0162988), 2016-10-11
Supplement: pone.0162988.s003.pdf [file pone.0162988.s003.pdf]

## SUPPORTING INFORMATION

### SUPPLEMENTARY TABLES

**Supplementary Table 4 - Table S4:** Results of Mann-Whitney *U* test (mean rank and sum of ranks) for comparison of bacterial density (cells/mL X 10<sup>8</sup>) in the saliva of children and adolescents from G-DS and G-ND

|                        | B/TAF       |             |             |             |             |             |             |             |             | Sum of probes | % total     |
|------------------------|-------------|-------------|-------------|-------------|-------------|-------------|-------------|-------------|-------------|---------------|-------------|
|                        | CARE        | O           | POGI        | TREII       | FUS         | PINT        | PNG         | ACAC        | DAPI        |               |             |
| Mann-Whitney U         | 281.50<br>0 | 413.00<br>0 | 298.50<br>0 | 299.50<br>0 | 281.50<br>0 | 228.50<br>0 | 270.00<br>0 | 321.50<br>0 | 336.00<br>0 | 335.00<br>0   | 309.00<br>0 |
| Wilcoxon W             | 746.50<br>0 | 878.00<br>0 | 763.50<br>0 | 764.50<br>0 | 746.50<br>0 | 693.50<br>0 | 735.00<br>0 | 786.50<br>0 | 801.00<br>0 | 800.00<br>0   | 774.00<br>0 |
| Z                      | -2.493      | -0.547      | -2.241      | -2.228      | -2.493      | -3.277      | -2.664      | -1.901      | -1.685      | -1.700        | -2.085      |
| Asymp. Sig. (2-tailed) | 0.013       | 0.584       | 0.025       | 0.026       | 0.013       | 0.001       | 0.008       | 0.057       | 0.092       | 0.089         | 0.037       |

a Grouping Variable: group
