# Supplementary material for: Salivary Periodontopathic Bacteria in Children and Adolescents with Down Syndrome
Source: PubMed Central journal article supplement (PMC5058504; doi:10.1371/journal.pone.0162988), 2016-10-11
Supplement: pone.0162988.s004.pdf [file pone.0162988.s004.pdf]

## SUPPORTING INFORMATION

### SUPPLEMENTARY TABLES

**Supplementary Table 2 - Table S2:** T-test to verify the significance of the association between groups (G-DS and DN) and Plaque index

| Independent Samples Test    |                                         |       |                              |    |                 |                 |                       |                                           |       |
|-----------------------------|-----------------------------------------|-------|------------------------------|----|-----------------|-----------------|-----------------------|-------------------------------------------|-------|
|                             | Levene's Test for Equality of Variances |       | T-test for Equality of Means |    |                 |                 |                       |                                           |       |
|                             | F                                       | Sig.  | t                            | Df | Sig. (2-tailed) | Mean difference | Std. Error difference | 95% confidence interval of the difference |       |
| IP                          |                                         |       |                              |    |                 |                 |                       | Lower                                     | Upper |
| Equal variances assumed     | 0.182                                   | 0.671 | 0.642                        | 58 | 0.523           | 0.7333          | 0.1142                | -0.155                                    | 0.302 |
| Equal variances not assumed |                                         |       | 0.642                        | 58 | 0.523           | 0.7333          | 0.1142                | -0.155                                    | 0.302 |
